# Supplementary material for: Adding organic matter to restore wetland soils may increase methane generation and is not needed for hydric soil development
Source: Copernicus journal article supplement (doi:10.5194/bg-2021-182), 2021-08-09
Supplement: Supplementary file 2 [file bg-2021-182-supplement.zip]

Archive with 2 entries (2 files):
- Supplemental Tables_v14.pdf
- Supplemental Figures_v14.pdf
