# Supplementary material for: Adding organic matter to restore wetland soils may increase methane generation and is not needed for hydric soil development
Source: Copernicus journal article supplement (doi:10.5194/bg-2021-182), 2021-08-09
Supplement: Supplementary file 2 [file bg-2021-182-supplement.zip › Supplemental Tables_v14.pdf]

## Supplemental Tables

1 **Supplemental Table S1:** All Experiments. Soil analyses for incubation microcosms.

2

| Soil | Sand | Silt | Clay | Fe<br>(hydroxylamine<br>hydrochloride)<br>mg/g | Fe<br>(dithionite)<br>mg/g | Fe<br>(oxalate)<br>mg/g | %C          |
|------|------|------|------|------------------------------------------------|----------------------------|-------------------------|-------------|
| SCL  | 60   | 15   | 24   | 0.39 ± 0.02                                    | 2.2 ± 0.28                 | 2.5 ± 0.10              | 2.08 ± 0.01 |
| SL   | 74   | 11   | 15   | 0.18 ± 0.01                                    | 0.29 ± 0.04                | 0.79 ± 0.03             | 0.61 ± 0.02 |

3

## Supplemental Tables

**Supplemental Table S3.** Percent of hydroxylamine hydrochloride extractable iron ( $\text{Fe}_{\text{HHCl}}$ ) measured in the liquid phase at the end of the incubation period (Experiment 1).

| Treatment | SCL                        |       |                                     |       | SL                         |       |                                     |       |
|-----------|----------------------------|-------|-------------------------------------|-------|----------------------------|-------|-------------------------------------|-------|
|           | $\text{Fe}^{2+}$<br>(mg/L) | stdev | % $\text{Fe}_{\text{HHCl}}$<br>used | stdev | $\text{Fe}^{2+}$<br>(mg/L) | stdev | % $\text{Fe}_{\text{HHCl}}$<br>used | stdev |
| Control   | 69.8                       | 50.2  | 1.7%                                | 1.2%  | 67.6                       | 2.6   | 20%                                 | 0.8%  |
| B1        | 45.5                       | 30.6  | 1.5%                                | 1.0%  | 80.8                       | 8.0   | 27%                                 | 2.0%  |
| B3        | 40.6                       | 7.2   | 1.9%                                | 0.3%  | 62.1                       | 11.0  | 28%                                 | 4.6%  |
| B6        | 32.1                       | 19.9  | 3.3%                                | 2.5%  | 38.8                       | 2.8   | 34%                                 | 9.7%  |
| M1        | 75.8                       | 25.2  | 2.1%                                | 0.6%  | 109.5                      | 4.3   | 40%                                 | 2.2%  |
| M3        | 85.4                       | 7.5   | 3.1%                                | 0.3%  | 95.6                       | 22.9  | 50%                                 | 3.0%  |
| M6        | 62.4                       | 22.1  | 19%                                 | 13%   | 54.0                       | 26.7  | 61%                                 | 11%   |
| L1        | 49.1                       | 31.7  | 9.9%                                | 6.5%  | 22.9                       | 9.2   | 8%                                  | 2.9%  |
| L3        | 17.9                       | 9.0   | 4.1%                                | 1.9%  | 8.3                        | 2.3   | 4%                                  | 1.1%  |
| L6        | 26.0                       | 9.5   | 8.6%                                | 3.0%  | 6.9                        | 0.6   | 5%                                  | 0.4%  |
| W1        | 62.7                       | 11.5  | 1.7%                                | 0.4%  | 75.6                       | 11.1  | 25%                                 | 2.7%  |
| W3        | 63.8                       | 9.2   | 2.3%                                | 0.4%  | 60.5                       | 6.7   | 28%                                 | 4.0%  |
| W6        | 38.7                       | 18.6  | 2.3%                                | 1.0%  | 44.8                       | 1.1   | 42%                                 | 8.4%  |
| H1        | 220.6                      | 75.5  | 43%                                 | 14%   | 158.1                      | 8.2   | 58%                                 | 5.1%  |
| H3        | 523.8                      | 199.8 | 79%                                 | 74%   | 214.4                      | 77.9  | 109%                                | 39%   |
| H6        | 466.8                      | 154.1 | 155%                                | 47%   | 268.6                      | 70.9  | 236%                                | 53%   |

## Supplemental Tables

**Supplemental Table S4.** MANOVA summary table for Fe<sup>2+</sup> production in Experiment 1 considering organic amendment type and dose (OM), pH (as continuous variable), and soil type (SL and SCL).

| Factor | DF | Exp. DF | F Value | p        |
|--------|----|---------|---------|----------|
| OM     | 28 | 63      | 17.44   | < 0.0001 |
| pH     | 1  | 63      | 1.09    | 0.30     |
| Soil   | 1  | 63      | 0.06    | 0.81     |

## Supplemental Tables

**Supplemental Table S2. Experiment 1.** Carbon dioxide (CO<sub>2</sub>), methane (CH<sub>4</sub>) and total gas production for Phase 1 and Phase 2 periods. The Break Point represents an abrupt shift from Phase 1 to Phase 2 gas production. The r<sup>2</sup> value, generated using the Segmented function in R, applies to both Phases. All ratio values (e.g. % CH<sub>4</sub>) are based on calculated gas production rates, not total values, so it is possible to have CH<sub>4</sub> + CO<sub>2</sub> > Total.

|                        |           |          | Phase 1         |           |                 |           |              |           |                   |                                              | Phase 2         |           |                 |           |           |           |                   |                                              |             |       |           |  |
|------------------------|-----------|----------|-----------------|-----------|-----------------|-----------|--------------|-----------|-------------------|----------------------------------------------|-----------------|-----------|-----------------|-----------|-----------|-----------|-------------------|----------------------------------------------|-------------|-------|-----------|--|
|                        |           |          | CO <sub>2</sub> |           | CH <sub>4</sub> |           | Total Gas    |           |                   |                                              | CO <sub>2</sub> |           | CH <sub>4</sub> |           | Total Gas |           |                   |                                              |             |       |           |  |
| Soil                   | Treatment | Soil (g) | cc/day          | cc/Kg/day | cc/day          | cc/Kg/day | cc/day       | cc/Kg/day | % CH <sub>4</sub> | CH <sub>4</sub> + CO <sub>2</sub> % of total | cc/day          | cc/Kg/day | cc/day          | cc/Kg/day | cc/day    | cc/Kg/day | % CH <sub>4</sub> | CH <sub>4</sub> + CO <sub>2</sub> % of total | Break Point | r^2   | Ph 2: Ph1 |  |
| SCL                    | Control   | 621.63   | 0.97            | 1.56      | 0.002           | 0.003     | 0.99         | 1.59      | 0.2%              | 99%                                          | 2.06            | 3.31      | 1.20            | 1.94      | 2.54      | 4.09      | 47%               | 128%                                         | 40.0 ± 4.5  | 0.959 | 2.57      |  |
| SCL                    | B1        | 425.24   | 1.53            | 3.61      | 0.08            | 0.18      | 4.13         | 9.70      | 2%                | 39%                                          | 5.58            | 13.13     | 1.47            | 3.45      | 5.49      | 12.91     | 27%               | 128%                                         | 29.3 ± 1.9  | 0.987 | 1.33      |  |
| SCL                    | B3        | 544.53   | 1.50            | 2.76      | 0.44            | 0.80      | 3.85         | 7.06      | 11%               | 50%                                          | 3.74            | 6.86      | 4.45            | 8.17      | 9.48      | 17.40     | 47%               | 86%                                          | 20.1 ± 3.4  | 0.974 | 2.46      |  |
| SCL                    | B6        | 468.02   | 2.09            | 4.46      | 0.06            | 0.13      | 3.53         | 7.55      | 2%                | 61%                                          | 7.42            | 15.85     | 10.90           | 23.29     | 18.20     | 38.89     | 60%               | 101%                                         | 10.3 ± 2.4  | 0.994 | 5.15      |  |
| SCL                    | M1        | 583.40   | 0.74            | 1.27      | 0.02            | 0.04      | 1.33         | 2.27      | 2%                | 58%                                          | 2.26            | 3.88      | 1.29            | 2.22      | 5.82      | 9.97      | 22%               | 61%                                          | 40.2 ± 2.1  | 0.997 | 4.39      |  |
| SCL                    | M3        | 495.56   | 1.79            | 3.61      | 0.32            | 0.64      | 2.05         | 4.13      | 15%               | 103%                                         | 4.64            | 9.37      | 5.39            | 10.89     | 10.69     | 21.58     | 50%               | 94%                                          | 20.8 ± 0.8  | 0.997 | 5.23      |  |
| SCL                    | M6        | 394.39   | 1.49            | 3.77      | 0.12            | 0.30      | 4.35         | 11.03     | 3%                | 37%                                          | 5.85            | 14.83     | 10.91           | 27.67     | 19.69     | 49.93     | 55%               | 85%                                          | 22.1 ± 3.2  | 0.956 | 4.53      |  |
| SCL                    | L1        | 586.46   | 0.83            | 1.42      | 0.001           | 0.001     | 0.85         | 1.45      | 0.1%              | 98%                                          | 3.85            | 6.57      | 0.05            | 0.090     | 3.96      | 6.76      | 1%                | 99%                                          | 32.2 ± 1.6  | 0.966 | 4.67      |  |
| SCL                    | L3        | 516.34   | 0.89            | 1.72      | 0.01            | 0.01      | 0.91         | 1.77      | 1%                | 98%                                          | 4.21            | 8.16      | 0.39            | 0.75      | 4.54      | 8.79      | 9%                | 101%                                         | 32.0 ± 2.2  | 0.983 | 4.97      |  |
| SCL                    | L6        | 410.17   | 0.67            | 1.63      | 0.04            | 0.09      | 0.80         | 1.95      | 5%                | 88%                                          | 5.90            | 14.39     | 0.92            | 2.24      | 6.95      | 16.95     | 13%               | 98%                                          | 32.0 ± 3.7  | 0.923 | 8.68      |  |
| SCL                    | W1        | 593.36   | 1.00            | 1.68      | 0.01            | 0.01      | 0.92         | 1.56      | 1%                | 109%                                         | 1.56            | 2.63      | 0.27            | 0.460     | 3.22      | 5.42      | 8%                | 57%                                          | 34.0 ± 3.7  | 0.986 | 3.48      |  |
| SCL                    | W3        | 539.61   | 0.98            | 1.81      | 0.10            | 0.19      | 1.39         | 2.58      | 7%                | 77%                                          | 1.93            | 3.58      | 1.90            | 3.52      | 4.51      | 8.35      | 42%               | 85%                                          | 24.2 ± 3.1  | 0.989 | 3.23      |  |
| SCL                    | W6        | 457.42   | 1.03            | 2.25      | 0.11            | 0.24      | 1.29         | 2.81      | 9%                | 89%                                          | 2.19            | 4.79      | 2.36            | 5.15      | 6.22      | 13.60     | 38%               | 73%                                          | 13.0 ± 2.4  | 0.981 | 4.84      |  |
| SL                     | Control   | 634.60   | 0.50            | 0.79      | 0.03            | 0.04      | 0.56         | 0.88      | 5%                | 94%                                          | 1.00            | 1.58      | 1.16            | 1.82      | 3.11      | 4.91      | 37%               | 69%                                          | 40.0 ± 3.2  | 0.957 | 5.55      |  |
| SL                     | B1        | 606.80   | 1.25            | 2.06      | 0.02            | 0.04      | 4.13         | 6.80      | 1%                | 31%                                          | 4.44            | 7.31      | 5.16            | 8.50      | 10.19     | 16.79     | 51%               | 94%                                          | 8.6 ± 3.0   | 0.880 | 2.47      |  |
| SL                     | B3        | 551.50   | 1.57            | 2.84      | 0.44            | 0.79      | 2.92         | 5.29      | 15%               | 69%                                          | 8.76            | 15.89     | 8.42            | 15.28     | 16.12     | 29.23     | 52%               | 107%                                         | 4.7 ± 1.8   | 0.989 | 5.53      |  |
| SL                     | B6        | 467.87   | 2.08            | 4.44      | 0.59            | 1.27      | 3.81         | 8.15      | 16%               | 70%                                          | 12.61           | 26.96     | 20.15           | 43.07     | 40.39     | 86.33     | 50%               | 81%                                          | 9.1 ± 1.2   | 0.992 | 10.59     |  |
| SL                     | M1        | 619.92   | 2.62            | 4.22      | 0.58            | 0.93      | 3.49         | 5.63      | 17%               | 92%                                          | 8.64            | 13.93     | 13.03           | 21.02     | 19.41     | 31.30     | 67%               | 112%                                         | 16.7 ± 0.7  | 0.998 | 5.56      |  |
| SL                     | M3        | 588.37   | 4.48            | 7.61      | 3.44            | 5.85      | 9.42         | 16.02     | 37%               | 84%                                          | 15.23           | 25.88     | 34.77           | 59.10     | 50.79     | 86.33     | 68%               | 98%                                          | 17.2 ± 1.5  | 0.992 | 5.39      |  |
| SL                     | M6        | 540.93   | 8.63            | 15.95     | 8.59            | 15.87     | 17.92        | 33.13     | 48%               | 96%                                          | 29.50           | 54.53     | 34.62           | 64.00     | 84.92     | 156.98    | 41%               | 76%                                          | 29.4 ± 1.4  | 0.974 | 4.74      |  |
| SL                     | L1        | 600.10   | 0.35            | 0.58      | 0.02            | 0.03      | 0.73         | 1.22      | 2%                | 50%                                          | 1.35            | 2.24      | 1.71            | 2.85      | 3.76      | 6.26      | 45%               | 81%                                          | 38.3 ± 1.2  | 0.992 | 5.12      |  |
| SL                     | L3        | 530.30   | 0.61            | 1.15      | 0.02            | 0.03      | 0.78         | 1.46      | 2%                | 81%                                          | 2.27            | 4.27      | 1.86            | 3.50      | 4.82      | 9.09      | 39%               | 86%                                          | 40.5 ± 2.0  | 0.977 | 6.22      |  |
| SL                     | L6        | 425.87   | 0.62            | 1.47      | 0.11            | 0.26      | 1.66         | 3.89      | 7%                | 44%                                          | 4.25            | 9.99      | 3.07            | 7.21      | 7.15      | 16.78     | 43%               | 102%                                         | 44.8 ± 1.3  | 0.988 | 4.31      |  |
| SL                     | W1        | 603.27   | 0.98            | 1.62      | 0.06            | 0.10      | 1.55         | 2.56      | 4%                | 67%                                          | 2.10            | 3.48      | 1.32            | 2.19      | 3.47      | 5.76      | 38%               | 98%                                          | 25.6 ± 7.6  | 0.762 | 2.25      |  |
| SL                     | W3        | 538.77   | 1.42            | 2.64      | 0.20            | 0.36      | 2.14         | 3.98      | 9%                | 76%                                          | 6.58            | 12.22     | 4.05            | 7.51      | 9.46      | 17.56     | 43%               | 112%                                         | 23.2 ± 2.3  | 0.974 | 4.41      |  |
| SL                     | W6        | 442.57   | 3.05            | 6.88      | 0.24            | 0.54      | 3.23         | 7.31      | 7%                | 102%                                         | 10.10           | 22.83     | 8.23            | 18.60     | 16.22     | 36.65     | 51%               | 113%                                         | 23.2 ± 1.1  | 0.991 | 5.02      |  |
|                        |           |          |                 |           |                 |           |              | AVERAGE   | 8.7%              | 75.4%                                        |                 |           |                 |           |           |           | 40.2%             | 93.3%                                        |             |       | 4.7       |  |
|                        |           |          |                 |           |                 |           |              | STDEV     | 11.3%             | 23.1%                                        |                 |           |                 |           |           |           | 17.5%             | 18.1%                                        |             |       | 1.9       |  |
| Sigmoidal curve values |           | Soil (g) | cc/day (max)    | cc/Kg/day | cc/day (max)    | cc/Kg/day | cc/day (max) | cc/Kg/day | % CH <sub>4</sub> | CH <sub>4</sub> + CO <sub>2</sub> % of total |                 |           |                 |           |           |           |                   |                                              |             |       |           |  |
| SCL                    | H1        | 573.03   | 9.70            | 16.93     | 10.40           | 18.15     | 18.40        | 32.11     | 57%               | 109%                                         |                 |           |                 |           |           |           |                   |                                              |             |       |           |  |
| SCL                    | H3        | 477.85   | 7.50            | 15.70     | 0.02            | 0.04      | 9.90         | 20.72     | 0.2%              | 76%                                          |                 |           |                 |           |           |           |                   |                                              |             |       |           |  |
| SCL                    | H6        | 334.20   | 6.60            | 19.75     | 0.09            | 0.27      | 6.70         | 20.05     | 1%                | 100%                                         |                 |           |                 |           |           |           |                   |                                              |             |       |           |  |
| SL                     | H1        | 582.57   | 8.90            | 15.28     | 16.20           | 27.81     | 18.40        | 31.58     | 88%               | 136%                                         |                 |           |                 |           |           |           |                   |                                              |             |       |           |  |
| SL                     | H3        | 478.00   | 20.80           | 43.51     | 12.20           | 25.52     | 36.80        | 76.99     | 33.2%             | 90%                                          |                 |           |                 |           |           |           |                   |                                              |             |       |           |  |
| SL                     | H6        | 321.13   | 14.70           | 45.78     | 13.20           | 41.10     | 35.60        | 110.86    | 37%               | 78%                                          |                 |           |                 |           |           |           |                   |                                              |             |       |           |  |

## Supplemental Tables

This page is intentionally left blank
